# Supplementary material for: Inulin-type fructans supplementation improves glycemic control for the prediabetes and type 2 diabetes populations: results from a GRADE-assessed systematic review and dose–response meta-analysis of 33 randomized controlled trials
Source: PubMed Central journal article supplement (PMC6896694; doi:10.1186/s12967-019-02159-0), 2019-12-05
Supplement: 12967_2019_2159_MOESM2_ESM.pdf [file 12967_2019_2159_MOESM2_ESM.pdf]

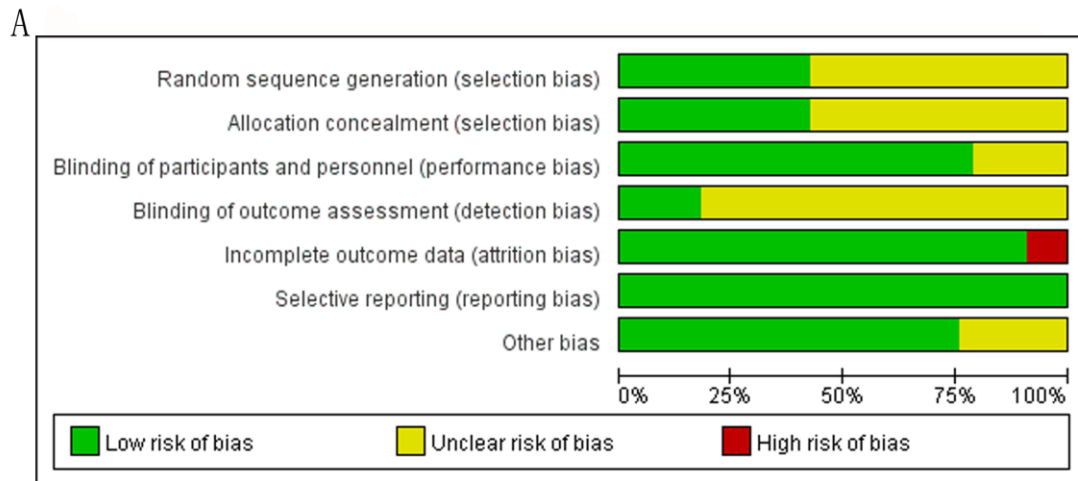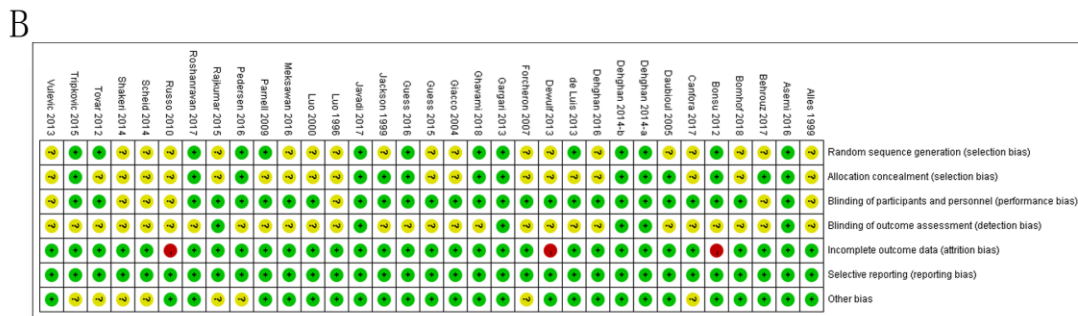

**Additional file 2: Figure S1.** Risk of bias graph (A) and risk of bias summary (B) in 33 randomized controlled trials
