# Supplementary material for: Inulin-type fructans supplementation improves glycemic control for the prediabetes and type 2 diabetes populations: results from a GRADE-assessed systematic review and dose–response meta-analysis of 33 randomized controlled trials
Source: Springer Nature journal article supplement (doi:10.1186/s12967-019-02159-0), 2019-12-01
Supplement: MOESM5 [file 17473984]

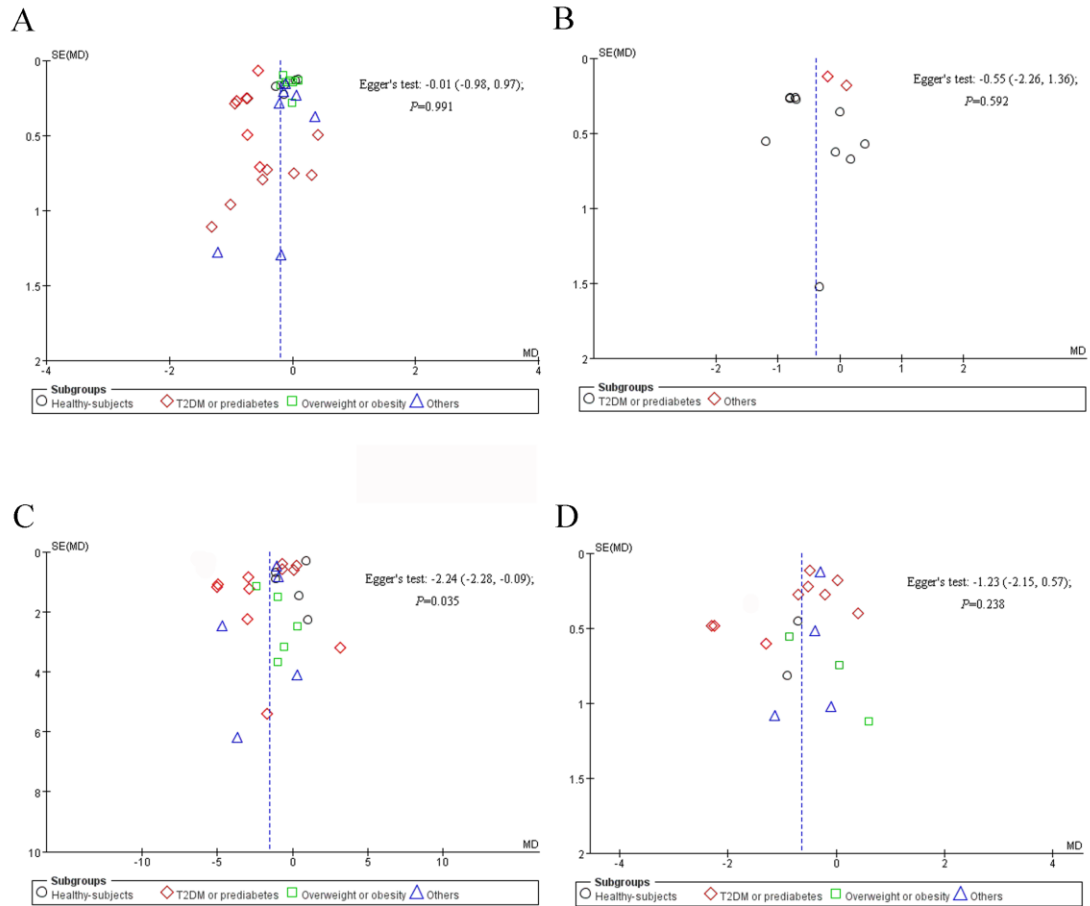

**Additional file 5: Figure S4.** Funnel plots for meta-analysis of inulin-type fructans on FBG (A), HbA1c (B), FINS (C), and HOMA-IR (D). FBG, fasting blood glucose; FINS, fasting insulin; HbA1c, glycosylated hemoglobin; HOMA-IR, homeostasis model assessment-insulin resistance
